# Supplementary material for: R-Flurbiprofen Reduces Neuropathic Pain in Rodents by Restoring Endogenous Cannabinoids
Source: PubMed Central journal article supplement (PMC2869361; doi:10.1371/journal.pone.0010628), 2010-05-13

Suppl. Figure S2

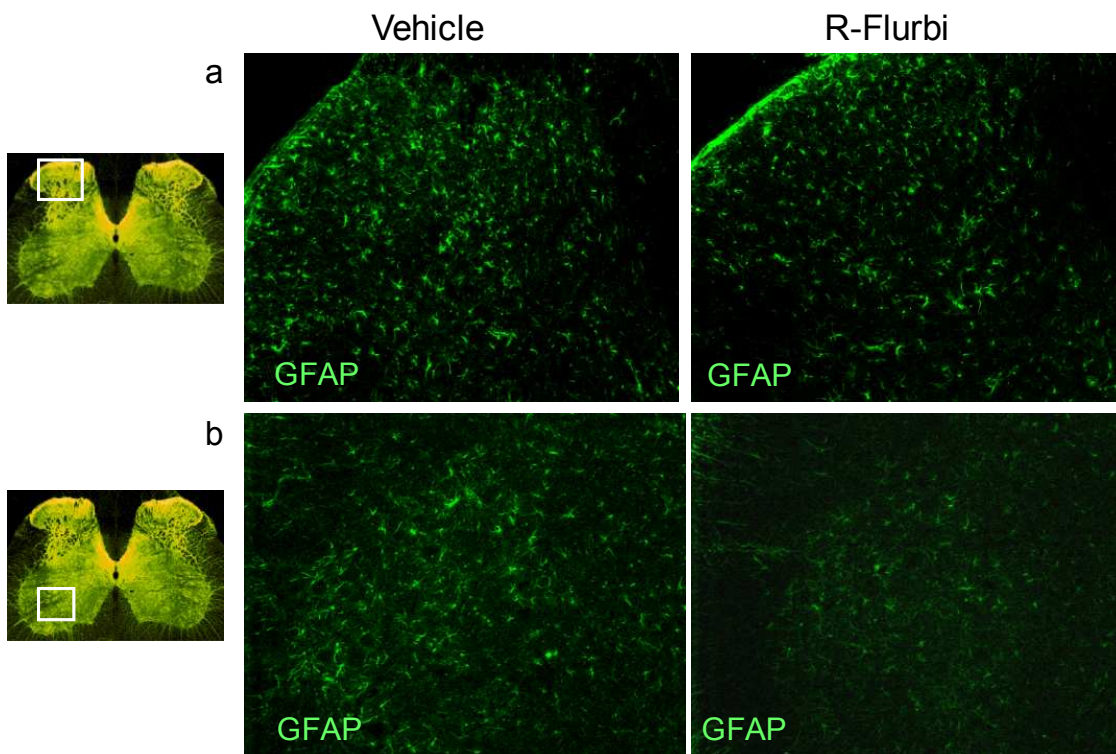

Supplement: pone.0010628.s002.pdf [file pone.0010628.s002.pdf]
